# Supplementary material
Source: publisher site journal article supplement (https://www.dovepress.com/article/563680)
Supplement: Supplementary file 1 [file Supplementary%20file.pdf]

## **Supplementary File S1**

### **Search Strategy for the study entitled “Pathophysiological Consequences Associated with Hormonal Contraceptives in Sub-Saharan Africa: A Scoping Review”**

This document outlines the comprehensive search strategies employed to identify relevant studies for the scoping review from PubMed, Wiley Online Library, Africa Journal Online (AJOL), and grey literature via Google Scholar. The search was conducted between January 2000 and July 2025, focusing on English publications.

#### **PubMed Search Strategy**

- **Database:** PubMed
- **Date Range:** January 2000 – July 2025
- **Languages:** English
- **Search String:**
  - ("hormonal contraceptives" OR "combined oral contraceptives" OR "progestin-only pills" OR "depot medroxyprogesterone acetate" OR "norethisterone enanthate" OR "subdermal implants" OR "hormonal IUD" OR "contraceptive methods") AND ("Sub-Saharan Africa" OR "SSA" OR specific country names [e.g., Nigeria, Kenya, South Africa]) AND ("pathophysiology" OR "physiological changes" OR "anemia" OR "cardiometabolic risk" OR "lipid profile" OR "blood pressure" OR "glucose metabolism" OR "bone mineral density" OR "immune response" OR "HIV acquisition" OR "menstrual irregularities")
- **Filters:** Humans, Female, Male, 15-49 years
- **Additional Steps:** MeSH terms ("Contraceptives, Hormonal"[Mesh], "Africa South of the Sahara"[Mesh]) were exploded and combined with keywords using Boolean operators (AND, OR). Results were limited to peer-reviewed articles.

#### **Wiley Online Library Search Strategy**

- **Database:** Wiley Online Library
- **Date Range:** January 2000 – July 2025
- **Languages:** English
- **Search String:**
  - ("hormonal contraceptives" OR "combined oral contraceptives" OR "progestin-only pills" OR "DMPA" OR "NET-EN" OR "implants" OR "hormonal IUD") AND ("Sub-Saharan Africa" OR "SSA" OR "Nigeria" OR "Kenya" OR "South Africa") AND ("pathophysiological effects" OR "anemia" OR "metabolic changes" OR "cardiovascular

risk" OR "lipids" OR "insulin resistance" OR "bone health" OR "immune function" OR "HIV risk")

- **Filters:** Publication years 2000-2025, peer-reviewed articles, subject areas (Medicine, Public Health)
- **Additional Steps:** Advanced search options were used to combine terms with Boolean operators. Results were manually screened for relevance.

### **Africa Journal Online (AJOL) Search Strategy**

- **Database:** Africa Journal Online (AJOL)
- **Date Range:** January 2000 – July 2025
- **Languages:** English
- **Search String:**
  - ("hormonal contraception" OR "oral contraceptives" OR "injectable contraceptives" OR "implants" OR "IUD") AND ("Sub-Saharan Africa" OR "SSA" OR country-specific terms) AND ("physiological impact" OR "anemia" OR "cardiometabolic outcomes" OR "lipid levels" OR "blood pressure" OR "bone density" OR "immune response" OR "HIV transmission")
- **Filters:** Open-access and subscription-based journals, publication years 2000-2025
- **Additional Steps:** Manual keyword searches were conducted due to limited advanced search functionality, with results cross-checked against inclusion criteria.

### **Grey Literature Search Strategy (Google Scholar)**

- **Source:** Google Scholar
- **Date Range:** January 2000 – July 2025
- **Languages:** English, French, Portuguese
- **Search String:**
  - ("hormonal contraceptives" "Sub-Saharan Africa" "pathophysiology" OR "anemia" OR "cardiometabolic" OR "lipids" OR "immune" OR "HIV"
- **Filters:** Publication years 2000-2025, sorted by relevance
- **Notes:** Exclusions applied to commercial sites and login-required pages to prioritize open-access grey literature.

### **General Notes**

- Boolean operators (AND, OR) were used to combine terms, with truncation () *applied where applicable (e.g., "contracept")*.
- Search results were deduplicated using reference management software and screened by two independent reviewers.

**Supplementary file S2:**

**Table S1: Data extraction sheet for the study entitled “Pathophysiological Consequences Associated with Hormonal Contraceptives in Sub-Saharan Africa: A Scoping Review”**

| <b>Serial No</b> | <b>First Author (Year)</b> | <b>Study Country</b>     | <b>Study Design</b>         | <b>Sample Size</b> | <b>Contraceptive Methods Used</b>       | <b>Pathologies/ Outcomes Measured</b>                | <b>Key Results (Effect Sizes, 95% CI, p-values)</b>                                                                                                   | <b>Limitations</b>                                                                                |
|------------------|----------------------------|--------------------------|-----------------------------|--------------------|-----------------------------------------|------------------------------------------------------|-------------------------------------------------------------------------------------------------------------------------------------------------------|---------------------------------------------------------------------------------------------------|
| 1                | (Chung et al., 2025)       | Multi-SSA (46 countries) | Cross-sectional (DHS)       | 790,065            | Hormonal (pills, injectables, implants) | Anemia (Hb <12 g/dL)                                 | AOR=0.73 (0.65–0.83, p<0.001); injectables AOR=0.64 (0.55–0.74, p<0.001); pills AOR=0.78 (0.68–0.90, p<0.001); implants AOR=0.83 (0.71–0.97, p=0.019) | Cross-sectional design limits causality; potential bias in anemia testing sensitivity/specificity |
| 2                | (Misunas et al., 2024)     | Multi-SSA (51 countries) | Cross-sectional (DHS)       | 104,167            | Hormonal contraceptives                 | Anemia (mild, moderate, severe)                      | Hormonal users less likely to be anemic; AOR=0.72 (0.66–0.79, p<0.001); moderate/severe anemia AOR=0.68 (0.60–0.77, p<0.001)                          | Cross-sectional, unable to assess causality; limited menstruation data                            |
| 3                | (Gedfie et al., 2022)      | Ethiopia                 | Comparative cross-sectional | 240                | DMPA, implant, COC                      | Hematologic parameters (platelets, RBC)              | Platelet count: COC 285 (IQR 238–332) vs DMPA 246 (IQR 220–226, p=0.010); implant negative correlation with RBC (p=0.033)                             | Cross-sectional, causality limited; single-center study                                           |
| 4                | (Stevens et al., 2022)     | Ethiopia                 | Observational cohort        | 1,200              | Injectables                             | Discontinuation due to side effects (anemia-related) | Discontinuation rate 22% higher in anemic women (AOR=1.22, 95% CI 1.03–1.45, p=0.023)                                                                 | Limited generalizability; self-reported side effects                                              |

|    |                           |          |                                  |             |                                |                                             |                                                                                                                                         |                                                            |
|----|---------------------------|----------|----------------------------------|-------------|--------------------------------|---------------------------------------------|-----------------------------------------------------------------------------------------------------------------------------------------|------------------------------------------------------------|
| 5  | (Teshome et al., 2022)    | Ethiopia | DHS secondary analysis           | 12,981      | Modern hormonal methods        | Anemia (Hb <12 g/dL)                        | AOR=0.68 (0.62–0.75, p<0.001); implants AOR=0.72 (0.60–0.86, p<0.001)                                                                   | Secondary data limitations; no longitudinal follow-up      |
| 6  | (Gona et al., 2021)       | Zimbabwe | DHS time-series analysis         | 7,634–9,235 | Modern methods (not specified) | Anemia (Hb <11/12 g/dL)                     | Prevalence 37.8% (2005) to 27.8% (2015); HIV+ OR=2.40–2.48 (p<0.05)                                                                     | Cross-sectional, no specific contraceptive effect isolated |
| 7  | (Haile et al., 2017)      | Tanzania | Population-based cross-sectional | 3,284       | Hormonal contraceptives        | Iron status (anemia)                        | Hormonal use associated with lower anemia risk (AOR=0.80, 0.68–0.94, p=0.007)                                                           | Cross-sectional; limited dietary data                      |
| 8  | (Kantarama, et al., 2025) | Rwanda   | Prospective cohort               | 65          | DMPA                           | Lipids (TG, HDL, TC/HDL), HbA1c, BP, hs-CRP | TG $\Delta$ +0.38 mmol/L (p=0.001); HDL $\Delta$ -0.19 mmol/L (p=0.001); TC/HDL $\Delta$ +2.45 (p=0.001); HbA1c $\Delta$ +0.3% (p=0.01) | Small sample; loss to follow-up (7/65)                     |
| 9  | (Turki et al., 2023)      | Ethiopia | Comparative cross-sectional      | 186         | POP, DMPA, Implanon            | Lipids (TC, TG, HDL, LDL)                   | TC $\Delta$ +13.52 mg/dL (p<0.001); TG $\Delta$ +10.14 mg/dL (p<0.001); DMPA TC 169.51±15.82 mg/dL (p<0.001)                            | Cross-sectional, causality limited; single-center          |
| 10 | (Kofale et al., 2023)     | Ethiopia | Cross-sectional                  | 220         | COC                            | FBG, BP, BMI, weight                        | FBG $\Delta$ +2.9% (p=0.025); MAP $\Delta$ +2.5% (p=0.04); BMI $\Delta$ +3.9% (p=0.003)                                                 | Cross-sectional; small sample; self-reported data          |
| 11 | (Jimoh et al., 2021)      | Nigeria  | Comparative study                | 225         | COC                            | Lipids, BP, AIP                             | LDL $\Delta$ +12.4 mg/dL (p=0.038); AIP $\Delta$ +0.15 (p=0.004); SBP $\Delta$ +4.2 mmHg (p=0.02)                                       | Short evaluation period; no long-term follow-up            |

|    |                          |          |                             |     |                                |                               |                                                                                                                    |                                            |
|----|--------------------------|----------|-----------------------------|-----|--------------------------------|-------------------------------|--------------------------------------------------------------------------------------------------------------------|--------------------------------------------|
| 12 | (Shiferaw et al, 2021)   | Ethiopia | Comparative cross-sectional | 146 | Progestin-only (DMPA, implant) | BMI, BP, lipids (TC, LDL, TG) | BMI $\Delta$ +1.2 kg/m <sup>2</sup> (p=0.045); SBP $\Delta$ +3.8 mmHg (p=0.027); TC $\Delta$ +15.6 mg/dL (p=0.005) | Small sample; cross-sectional design       |
| 13 | (Bakesiima et al., 2018) | Uganda   | Cross-sectional             | 384 | Hormonal contraceptives        | Dyslipidemia                  | Prevalence 63.3% (95% CI 58.4–68.1); BMI PR=1.33 (1.15–1.54, p<0.001)                                              | Non-probability sampling; no control group |
| 14 | (Kantarama et al., 2023) | Rwanda   | Prospective cohort          | 90  | DMPA                           | WC, lipids, HbA1c, hs-CRP, BP | TC $\Delta$ +0.52 mmol/L (p<0.05); HbA1c $\Delta$ +0.8% (p<0.05); WC $\Delta$ +2.1 cm (p=0.03)                     | Self-report bias; loss to follow-up        |
| 15 | (Fekadi et al., 2016)    | Ethiopia | Observational/Comparative   | 150 | DMPA                           | Lipids                        | TC $\Delta$ +10.2 mg/dL (p=0.01); LDL $\Delta$ +8.7 mg/dL (p=0.02)                                                 | Small sample; no control for confounders   |
| 16 | (Asare et al., 2014)     | Ghana    | Cross-sectional             | 95  | OCs, injectables, implant      | Lipids, CV indices            | TC 4.07±0.91 vs 3.35±0.62 mmol/L (p=0.002); LDL 2.38±0.84 vs 1.74±0.57 mmol/L (p=0.003)                            | No dietary data; cross-sectional           |
| 17 | (Ac et al, 2003)         | Nigeria  | Comparative study           | 80  | Hormonal contraceptives        | Lipids                        | TC $\Delta$ +9.8 mg/dL (p=0.04); HDL $\Delta$ -5.2 mg/dL (p=0.03)                                                  | Limited sample size; no long-term data     |
| 18 | (Olumuyiwa et al., 2018) | Nigeria  | Comparative cross-sectional | 100 | Etonogestrel (Implanon)        | Lipids                        | HDL $\Delta$ +6.3 mg/dL (p=0.02); no significant TC, LDL changes                                                   | Small sample; short follow-up              |
| 19 | (Bawah et al., 2018)     | Ghana    | Cross-sectional             | 120 | Various contraceptives         | Lipids, CV risk               | TC $\Delta$ +11.5 mg/dL (p=0.01); LDL $\Delta$ +9.1 mg/dL (p=0.02)                                                 | Cross-sectional; no control group          |
| 20 | (Sufa et al., 2019)      | Ethiopia | Cross-sectional             | 200 | Hormonal contraceptives        | Dyslipidemia                  | Prevalence 48.2% (95% CI 41.5–55.0); OR=2.1 (1.4–3.2, p=0.001)                                                     | No dietary control; cross-sectional        |

|    |                               |              |                                   |     |                                               |                                                           |                                                                                                                             |                                                             |
|----|-------------------------------|--------------|-----------------------------------|-----|-----------------------------------------------|-----------------------------------------------------------|-----------------------------------------------------------------------------------------------------------------------------|-------------------------------------------------------------|
| 21 | (Adekunle et al., 2000)       | Nigeria      | Clinical study                    | 60  | Nomegestrol acetate (Uniplant)                | Lipids (cholesterol, TG, lipoproteins)                    | No significant changes in TC, TG, HDL, LDL (p>0.05)                                                                         | Small sample; short duration                                |
| 22 | (Aisien and Idogun, 2016)     | Nigeria      | Comparative study                 | 90  | Etonogestrel (Implanon)                       | Lipids, Hb                                                | Hb $\Delta$ +0.7 g/dL (p=0.03); HDL $\Delta$ +5.8 mg/dL (p=0.04)                                                            | Small sample; no long-term follow-up                        |
| 23 | (Habyarimana et al., 2022)    | Rwanda       | Cross-sectional                   | 88  | Implant, Depo-Provera, progesterone, combined | Lipids (HDL, TG, TC, LDL)                                 | LDL OR=11 (5.2–23.1, p=0.01); TC OR=14 (6.5–29.8, p=0.018); TG OR=2.8 (1.3–6.0, p=0.02)                                     | Small sample; cross-sectional                               |
| 24 | (Marc Bertrand et al., 2024a) | Cameroon     | Cross-sectional                   | 231 | Hormonal methods                              | Metabolic syndrome                                        | Prevalence 58.82% (95% CI 52.3–65.2, p=0.63)                                                                                | Cross-sectional; limited confounder control                 |
| 25 | (Avenant et al., 2024)        | South Africa | Secondary analysis of RCT (WHICH) | 435 | DMPA-IM, NET-EN                               | Testosterone, SHBG                                        | Testosterone $\Delta$ -24.3% DMPA (p<0.0001); -54.1% NET-EN (p<0.0001); SHBG $\Delta$ -29.8% DMPA, -65.1% NET-EN (p<0.0001) | Recall bias; specific population (HIV+)                     |
| 26 | (Singatamadliki et al., 2024) | South Africa | Randomized trial (WHICH)          | 521 | DMPA-IM, NET-EN                               | Estradiol, depression, sexual behavior, menstrual effects | Estradiol $\Delta$ -60% DMPA, -62% NET-EN (p<0.001); amenorrhoea RR=1.12 (1.02–1.23, p=0.016)                               | Small sample for some outcomes; high loss to follow-up      |
| 27 | (Hofmeier et al., 2024)       | Multi-SSA    | Ancillary analysis of RCT (ECHO)  | 398 | DMPA-IM, LNG implant                          | Testosterone, SHBG, free testosterone                     | Testosterone $\Delta$ -28.35% DMPA vs IUD (p<0.001); SHBG $\Delta$ -50.04% implant vs IUD (p<0.001)                         | Early closure reduced power; specific population (HIV risk) |
| 28 | (Haddad et al., 2023)         | Malawi       | Observational with lab analyses   | 120 | Hormonal contraceptives                       | Cervicovaginal cytokines, microbiota                      | Increased IL-6, IL-8 in hormonal users (p<0.05); altered microbiota diversity                                               | Small sample; observational design                          |

|    |                                |              |                              |       |                         |                                                      |                                                                                                            |                                             |
|----|--------------------------------|--------------|------------------------------|-------|-------------------------|------------------------------------------------------|------------------------------------------------------------------------------------------------------------|---------------------------------------------|
| 29 | (Bunjun et al., 2022)          | South Africa | Randomized trial             | 80    | DMPA-IM                 | Th17-like HIV target cells                           | Increased Th17-like cells in DMPA users (p=0.02)                                                           | Small sample; short-term study              |
| 30 | (Singata-Madliki et al., 2021) | Multi-SSA    | Ancillary study of RCT       | 552   | DMPA-IM, LNG implant    | HIV acquisition, menstrual symptoms, sexual behavior | Amenorrhea higher in progestins (p<0.001); intra-menstrual coitus lower DMPA (RR=0.78, 0.68–0.89, p<0.001) | High loss to follow-up; specific population |
| 31 | (Morris et al., 2020)          | Multi-SSA    | RCT cohort analysis          | 7,829 | DMPA-IM, LNG implant    | Early HIV disease progression                        | No significant effect on HIV progression (p>0.05)                                                          | Limited power for rare outcomes             |
| 32 | (Noguchi et al., 2015)         | South Africa | Prospective cohort           | 3,147 | Injectable progestins   | HIV acquisition risk                                 | DMPA HR=1.41 (1.06–1.89, p=0.02)                                                                           | Observational; potential confounding        |
| 33 | (Myer et al., 2007).           | South Africa | Prospective cohort           | 4,200 | Hormonal contraceptives | HIV infection risk                                   | No significant association (HR=1.12, 0.89–1.42, p=0.33)                                                    | Limited power; self-reported use            |
| 34 | (Todd et al., 2020)            | South Africa | Randomized controlled trial  | 199   | LNG-IUS                 | gVL, pVL, discontinuation                            | gVL AOR=0.78 (0.44–1.38, p=0.39); continuation 78%; expulsion C-IUD 8% vs LNG 1% (p=0.02)                  | Small sample; high loss to follow-up        |
| 35 | (Kakaire et al., 2015a)        | Uganda       | Randomized controlled trial  | 703   | LNG-IUS                 | Discontinuation, side effects                        | Discontinuation 8.6% copper vs 8.1% LNG (RR=1.1, 0.64–1.96, p=0.71)                                        | Limited follow-up duration                  |
| 36 | (Harryarsad et al., 2023)      | South Africa | Prospective cohort           | 162   | Injectables, LARC       | STI prevalence/incidence (CT, NG, TV, MG, HSV-2)     | STI incidence 107.9/100 wy; CT 75.9/100 wy (18–21 yrs) vs 17.4/100 wy (26–33 yrs, p=0.049)                 | Small sample; no control group              |
| 37 | (Deese et al., 2021)           | Multi-SSA    | Randomized cohort comparison | 7,829 | DMPA-IM, LNG implant    | STI prevalence (chlamydia)                           | PR=0.90 DMPA vs IUD (0.79–1.04, p=0.16)                                                                    | High loss to follow-up; specific population |

|    |                               |              |                                    |       |                                   |                                 |                                                                        |                                             |
|----|-------------------------------|--------------|------------------------------------|-------|-----------------------------------|---------------------------------|------------------------------------------------------------------------|---------------------------------------------|
| 38 | (Kiweewa et al., 2019)        | Multi-SSA    | Prospective study                  | 2,326 | Injectables, implants             | STI acquisition                 | No significant association (HR=1.15, 0.92–1.44, p=0.22)                | Observational; potential confounding        |
| 39 | (Kakaire et al., 2015b)       | Uganda       | Randomized controlled trial        | 703   | IUD (with STI screening)          | IUC removal, unscheduled visits | Removal IRR=1.1 (0.63–1.93, p=0.72); PID incidence 5 cases             | Partner STI not assessed; small sample      |
| 40 | (Matubu et al., 2021)         | Zimbabwe     | Laboratory immunology study        | 60    | DMPA-IM, NET-EN                   | Cytokine production             | Increased IL-1 $\beta$ , IL-6 in DMPA users (p<0.05)                   | Small sample; in vitro study                |
| 41 | (Balle et al., 2020)          | South Africa | Randomized trial                   | 130   | Hormonal contraceptives           | Vaginal microbiota, cytokines   | Increased cytokines in CCVR (p<0.05); reduced lactobacilli             | Small sample; short-term study              |
| 42 | (Konstantinus et al., 2020)   | South Africa | Randomized crossover study         | 130   | NET-EN, COC, CCVR                 | Cervical Th17 phenotype         | Lower Th17 in CCVR (p=0.001); no significant NET-EN, COC effect        | Small sample; crossover design complexity   |
| 43 | (Crucitti et al., 2018)       | Rwanda       | Randomized open-label longitudinal | 120   | Contraceptive vaginal ring        | BV (Nugent), microbiota         | Nugent score decrease (p<0.001); lactobacilli increase (p=0.031–0.041) | Small sample; open-label design             |
| 44 | (Ngcapu et al., 2015)         | South Africa | Observational laboratory study     | 85    | Injectable hormonal contraception | Chemotactic cytokines           | Lower IL-8, MIP-1 $\alpha$ in injectables (p<0.05)                     | Small sample; observational                 |
| 45 | (Avenant et al., 2023)        | South Africa | RCT                                | 435   | DMPA-IM, NET-EN                   | Progestin levels, BMI, weight   | MPA 6.59 nM; NET 13.6 nM; negative correlation with BMI (p<0.05)       | Recall bias; specific population (HIV+)     |
| 46 | (Kiweewa Matovu et al., 2022) | Uganda       | Prospective cohort                 | 265   | DMPA (with TDF-based ART)         | Bone loss                       | BMD $\Delta$ -2.8% in DMPA+ART vs -1.1% ART alone (p=0.01)             | Small sample; specific population (HIV+)    |
| 47 | (Singata-Madliki)             | Multi-SSA    | Ancillary study of RCT             | 552   | DMPA-IM, LNG implant              | Depression, sexual function     | No significant depression increase (p>0.05);                           | High loss to follow-up; specific population |

|    |                           |                           |                                    |     |                                          |                                      |                                                                |                                 |
|----|---------------------------|---------------------------|------------------------------------|-----|------------------------------------------|--------------------------------------|----------------------------------------------------------------|---------------------------------|
|    | et al., 2021)             |                           |                                    |     |                                          |                                      | sexual function unchanged                                      |                                 |
| 48 | (Arowojolu, et al., 2002) | Nigeria                   | Randomized controlled trial        | 150 | Levonorgestrel (emergency contraception) | Bleeding disturbances, nausea        | Irregular bleeding 15% (p=0.04); nausea 12% (p=0.06)           | Small sample; short-term study  |
| 49 | (Sagay, et al., 2002)     | Nigeria                   | Comparative clinical study         | 80  | Levonorgestrel (Norplant)                | Electrocardiographic changes         | Prolonged QT interval in 10% (p=0.03)                          | Small sample; no control group  |
| 50 | (Isichei et al., 2000)    | Nigeria                   | Preliminary clinical investigation | 30  | RICOM-1013-J (Ricinus communis)          | Chemical pathological effects        | No significant liver, kidney function changes (p>0.05)         | Small sample; preliminary study |
| 51 | (Coutinho et al., 2000)   | International (incl. SSA) | Multicenter dose-finding study     | 150 | Gossypol (male contraceptive)            | Toxicity, spermatogenesis inhibition | Hypokalemia in 5% (p=0.02); no significant liver/renal effects | Small SSA sample; male-focused  |
